# Supplementary material for: A theoretical study of the interactions of NF3with neutral ambidentate electron donor and acceptor molecules
Source: Royal Society of Chemistry journal article supplement (doi:10.1039/c0cp00199f), 2010-10-29
Supplement: c0cp00199f.pdf [file c0cp00199f.pdf]

## SUPPLEMENTARY MATERIAL

*Physical Chemistry Chemical Physics*

### A theoretical study of the interactions of NF<sub>3</sub> with neutral ambidentate electron donor and acceptor molecules

Fernando Blanco,<sup>\*,a</sup> Ibon Alkorta,<sup>b</sup> Isabel Rozas,<sup>a</sup>  
Mohammad Solimannejad<sup>c</sup> and Jose Elguero<sup>b</sup>

<sup>a</sup> School of Chemistry, University of Dublin, Trinity College, Dublin 2, Ireland

<sup>b</sup> Instituto de Química Médica (CSIC), Juan de la Cierva, 3; 28006-Madrid, Spain

<sup>c</sup> Quantum Chemistry Group, Department of Chemistry, Arak University, 38156-879 Arak, Iran

#### Total Energy (Hartree) and Dipole moment ( $\mu$ ) of dimers at MP2/6-311++g(d,p) Level

| XY  | Comp. | PG  | MP2 Energy  | Dipole |
|-----|-------|-----|-------------|--------|
| HF  | A     | C3V | -453.730468 | 2.06   |
| HF  | B     | CS  | -453.728948 | 2.80   |
| HF  | C     | CS  | -453.729120 | 2.28   |
| HF  | D     | CS  | -453.728292 | 2.22   |
| HF  | E     | C3V | -453.727460 | 1.68   |
| CIF | A     | C3V | -912.676998 | 1.45   |
| CIF | B     | CS  | -912.675599 | 2.21   |
| CIF | C     | CS  | -912.675733 | 1.47   |
| CIF | D     | CS  | -912.675948 | 1.88   |
| CIF | E     | C3V | -912.675625 | 1.10   |
| HNC | A     | C3V | -446.624389 | 2.76   |
| HNC | B     | CS  | -446.623884 | 3.63   |
| HNC | C     | CS  | -446.623870 | 3.10   |
| HNC | D     | CS  | -446.623343 | 3.32   |
| HNC | E     | C3V | -446.621986 | 2.41   |
| HCN | A     | C3V | -446.652878 | 3.12   |
| HCN | B     | CS  | -446.652785 | 4.03   |
| HCN | C     | CS  | -446.652633 | 3.48   |
| HCN | D     | CS  | -446.653178 | 3.68   |
| HCN | E     | C3V | -446.651917 | 2.94   |

**Total Energy (Hartree) and Dipole moment ( $\mu$ ) of trimers at MP2/6-311++g(d,p) Level**

| XY  | Comp. | PG  | MP2 Energy   | Dipole |
|-----|-------|-----|--------------|--------|
| HF  | BD    | CS  | -554.010571  | 4.27   |
| HF  | CD    | CS  | -554.010835  | 3.10   |
| HF  | AE    | CS  | -554.011347  | 4.32   |
| HF  | CE    | CS  | -554.009996  | 3.56   |
| CIF | BD    | CS  | -1471.904305 | 3.54   |
| CIF | CD    | CS  | -1471.907160 | 3.33   |
| CIF | AE    | C3V | -1471.905475 | 2.96   |
| CIF | CE    | CS  | -1471.904224 | 2.66   |
| HNC | BD    | CS  | -539.801204  | 6.49   |
| HNC | CD    | CS  | -539.801348  | 5.26   |
| HNC | AE    | C3V | -539.800310  | 7.13   |
| HNC | CE    | CS  | -539.799853  | 4.93   |
| HCN | BD    | CS  | -539.859550  | 7.17   |
| HCN | CD    | CS  | -539.859539  | 5.67   |
| HCN | AE    | C3V | -539.858270  | 6.27   |

**Variations in the properties of NF<sub>3</sub> and XY upon complexation and total complex volume obtained using the AIM methodology at the M05-2x/6-311++G(d,p) computational level**

| XY  | Comp. | $\Delta E$ NF <sub>3</sub> (kJ mol <sup>-1</sup> ) <sup>a</sup> | Charge NF <sub>3</sub> (e) <sup>b</sup> | $\Delta$ VOL NF <sub>3</sub> (au) <sup>c</sup> | $\Delta E$ XY (kJ mol <sup>-1</sup> ) <sup>a</sup> | $\Delta$ VOL XY (au) <sup>c</sup> |
|-----|-------|-----------------------------------------------------------------|-----------------------------------------|------------------------------------------------|----------------------------------------------------|-----------------------------------|
| HF  | A     | -21.04                                                          | 0.019                                   | -8.45                                          | 11.35                                              | -5.45                             |
| HF  | B     | -28.70                                                          | 0.004                                   | -2.63                                          | 21.36                                              | -3.22                             |
| HF  | C     | -29.61                                                          | 0.003                                   | -3.17                                          | 22.31                                              | -4.36                             |
| HF  | D     | -20.94                                                          | 0.001                                   | -6.70                                          | 13.80                                              | -2.61                             |
| HF  | E     | -21.34                                                          | 0.001                                   | -1.31                                          | 17.99                                              | -0.26                             |
| CIF | A     | -31.45                                                          | 0.017                                   | -8.59                                          | 21.42                                              | -4.50                             |
| CIF | B     | -39.42                                                          | -0.004                                  | -1.06                                          | 32.82                                              | -2.21                             |
| CIF | C     | -43.59                                                          | -0.003                                  | -1.87                                          | 37.74                                              | -3.16                             |
| CIF | D     | -39.66                                                          | 0.003                                   | -3.74                                          | 33.35                                              | -1.36                             |
| CIF | E     | -41.61                                                          | 0.003                                   | -3.45                                          | 36.70                                              | -2.22                             |
| HNC | A     | -221.89                                                         | 0.010                                   | -5.63                                          | 216.30                                             | 0.15                              |
| HNC | B     | -226.77                                                         | 0.002                                   | -1.85                                          | 221.13                                             | -1.48                             |
| HNC | C     | -227.84                                                         | 0.001                                   | -2.42                                          | 222.35                                             | -2.16                             |
| HNC | D     | -225.43                                                         | -0.011                                  | 1.44                                           | 219.49                                             | -3.61                             |
| HNC | E     | -225.28                                                         | -0.008                                  | 3.42                                           | 222.80                                             | 0.67                              |
| HCN | A     | -241.23                                                         | 0.004                                   | -2.43                                          | 238.10                                             | 0.16                              |
| HCN | B     | -243.46                                                         | -0.001                                  | -0.65                                          | 239.13                                             | -0.35                             |
| HCN | C     | -245.47                                                         | -0.001                                  | -0.67                                          | 241.30                                             | -0.31                             |

|            |          |         |        |       |        |       |
|------------|----------|---------|--------|-------|--------|-------|
| <b>HCN</b> | <b>D</b> | -234.42 | -0.007 | -0.66 | 227.03 | -3.04 |
| <b>HCN</b> | <b>E</b> | -236.65 | -0.006 | 0.88  | 233.27 | -0.29 |

<sup>a</sup> Negative values mean a stabilization of the corresponding subunit in the complex

<sup>b</sup> Positive values mean charge transfer from NF<sub>3</sub> to XY in the complex

<sup>c</sup> Negative values mean a contraction of the volume of the corresponding subunit in the complex

**DEF (NEDA analysis) values of calculated dimers at the M02x/6-311++G(d,p) computational level**

| <b>XY</b>  | <b>Comp.</b> | <b>DEF NF<sub>3</sub></b> | <b>DEF XY</b> |
|------------|--------------|---------------------------|---------------|
| <b>HF</b>  | <b>A</b>     | 32.43                     | 19.37         |
| <b>HF</b>  | <b>B</b>     | 17.11                     | 12.13         |
| <b>HF</b>  | <b>C</b>     | 18.12                     | 13.35         |
| <b>HF</b>  | <b>D</b>     | 23.64                     | 15.02         |
| <b>HF</b>  | <b>E</b>     | 18.49                     | 10.00         |
| <b>CIF</b> | <b>A</b>     | 72.80                     | 27.66         |
| <b>CIF</b> | <b>B</b>     | 34.73                     | 19.92         |
| <b>CIF</b> | <b>C</b>     | 34.98                     | 20.79         |
| <b>CIF</b> | <b>D</b>     | 16.65                     | 14.18         |
| <b>CIF</b> | <b>E</b>     | 16.86                     | 10.71         |
| <b>HNC</b> | <b>A</b>     | 37.99                     | 4.10          |
| <b>HNC</b> | <b>B</b>     | 26.57                     | 4.73          |
| <b>HNC</b> | <b>C</b>     | 28.28                     | 5.36          |
| <b>HNC</b> | <b>D</b>     | 16.44                     | 10.00         |
| <b>HNC</b> | <b>E</b>     | 10.71                     | 6.69          |
| <b>HCN</b> | <b>A</b>     | 26.57                     | 2.80          |
| <b>HCN</b> | <b>B</b>     | 19.87                     | 5.27          |
| <b>HCN</b> | <b>C</b>     | 18.74                     | 5.23          |
| <b>HCN</b> | <b>D</b>     | 25.86                     | 13.93         |
| <b>HCN</b> | <b>E</b>     | 20.63                     | 6.95          |

**DEF (NEDA analysis) values of calculated trimers at the M02x/6-311++G(d,p) computational level**

| <b>XY</b>  | <b>Comp.</b> | <b>DEF NF<sub>3</sub></b> | <b>DEF X<sub>1</sub>Y<sub>1</sub></b> | <b>DEF X<sub>2</sub>Y<sub>2</sub></b> |
|------------|--------------|---------------------------|---------------------------------------|---------------------------------------|
| <b>HF</b>  | <b>BD</b>    | 46.65                     | 17.70                                 | 13.81                                 |
| <b>HF</b>  | <b>CD</b>    | 45.10                     | 15.36                                 | 15.02                                 |
| <b>HF</b>  | <b>AE</b>    | 62.63                     | 15.31                                 | 21.42                                 |
| <b>HF</b>  | <b>CE</b>    | 45.98                     | 15.48                                 | 15.56                                 |
| <b>CIF</b> | <b>BD</b>    | 55.61                     | 13.56                                 | 22.80                                 |
| <b>CIF</b> | <b>CD</b>    | 55.19                     | 13.01                                 | 23.85                                 |
| <b>CIF</b> | <b>AE</b>    | 93.72                     | 10.42                                 | 29.87                                 |
| <b>CIF</b> | <b>CE</b>    | 56.07                     | 12.09                                 | 24.02                                 |
| <b>HNC</b> | <b>BD</b>    | 50.38                     | 12.26                                 | 5.77                                  |
| <b>HNC</b> | <b>CD</b>    | 52.17                     | 12.38                                 | 6.36                                  |
| <b>HNC</b> | <b>AE</b>    | 57.99                     | 10.59                                 | 4.81                                  |
| <b>HNC</b> | <b>CE</b>    | 43.64                     | 9.37                                  | 6.07                                  |
| <b>HCN</b> | <b>BD</b>    | 53.51                     | 17.70                                 | 6.65                                  |
| <b>HCN</b> | <b>CD</b>    | 52.76                     | 17.66                                 | 6.69                                  |
| <b>HCN</b> | <b>AE</b>    | 52.55                     | 8.74                                  | 3.26                                  |

**Interaction Energies (kJ mol<sup>-1</sup>) and cooperative effect energy (kJ mol<sup>-1</sup>) of the calculated trimers**

| XY         | Comp.     | M052x/6-311++g(d,p) |                          | MP2/6-311++g(d,p) |                          | MP2/aug-cc-pvtz  |                          |
|------------|-----------|---------------------|--------------------------|-------------------|--------------------------|------------------|--------------------------|
|            |           | E <sub>int</sub>    | Coop-Effect <sup>a</sup> | E <sub>int</sub>  | Coop-Effect <sup>a</sup> | E <sub>int</sub> | Coop-Effect <sup>a</sup> |
| <b>HF</b>  | <b>BD</b> | -16.42              | -1.21                    | -13.59            | -1.11                    | -12.48           | -0.99                    |
| <b>HF</b>  | <b>CD</b> | -15.95              | -0.55                    | -14.28            | -1.25                    | -12.70           | -0.97                    |
| <b>HF</b>  | <b>AE</b> | -16.11              | -1.17                    | -15.63            | -0.89                    | -14.82           | -1.22                    |
| <b>HF</b>  | <b>CE</b> | -13.59              | -0.36                    | -12.08            | -0.42                    | -10.53           | -0.52                    |
| <b>CIF</b> | <b>BD</b> | -14.04              | -0.32                    | -12.68            | -0.45                    | -11.84           | -0.24                    |
| <b>CIF</b> | <b>CD</b> | -13.00              | -0.02                    | -*                | -*                       | -*               | -*                       |
| <b>CIF</b> | <b>AE</b> | -16.92              | -1.49                    | -15.75            | -0.47                    | -14.31           | -0.48                    |
| <b>CIF</b> | <b>CE</b> | -12.07              | -0.21                    | -12.47            | -0.32                    | -9.40            | -0.19                    |
| <b>HNC</b> | <b>BD</b> | -15.38              | -1.53                    | -17.04            | -1.68                    | -17.55           | -1.69                    |
| <b>HNC</b> | <b>CD</b> | -15.09              | -1.27                    | -17.42            | -1.75                    | -17.29           | -1.56                    |
| <b>HNC</b> | <b>AE</b> | -12.05              | -0.89                    | -14.70            | -1.12                    | -15.62           | -1.38                    |
| <b>HNC</b> | <b>CE</b> | -11.91              | 0.09                     | -13.50            | -0.20                    | -13.46           | -0.45                    |
| <b>HCN</b> | <b>BD</b> | -14.37              | -1.22                    | -14.42            | -1.10                    | -15.11           | -0.99                    |
| <b>HCN</b> | <b>CD</b> | -13.72              | -1.08                    | -14.39            | -1.10                    | -*               | -*                       |
| <b>HCN</b> | <b>AE</b> | -9.51               | -0.75                    | -11.05            | -0.60                    | -11.60           | -0.90                    |

<sup>a</sup> Negative values mean greater stability of the trimer compared to the sum of energies of the isolated dimers

\* These geometries spontaneously evolve to other ones

**Interaction distances (Å) calculated for the trimers computed in this study**

| XY         | Comp.     | M052x/6-311++g(d,p) |                | MP2/6-311++g(d,p) |                | MP2/aug-cc-pvtz |                |
|------------|-----------|---------------------|----------------|-------------------|----------------|-----------------|----------------|
|            |           | d <sub>1</sub>      | d <sub>2</sub> | d <sub>1</sub>    | d <sub>2</sub> | d <sub>1</sub>  | d <sub>2</sub> |
| <b>HF</b>  | <b>BD</b> | 2.805               | 2.015          | 2.942             | 2.080          | 2.917           | 2.045          |
| <b>HF</b>  | <b>CD</b> | 2.850               | 1.979          | 2.966             | 2.017          | 2.926           | 1.997          |
| <b>HF</b>  | <b>AE</b> | 2.897               | 2.021          | 3.04              | 2.022          | 3.088           | 1.992          |
| <b>HF</b>  | <b>CE</b> | 2.883               | 1.971          | 3.021             | 2.009          | 3.073           | 1.991          |
| <b>CIF</b> | <b>BD</b> | 2.868               | 2.793          | 2.978             | 2.923          | 2.986           | 2.859          |
| <b>CIF</b> | <b>CD</b> | 2.891               | 2.762          | -*                | -*             | -*              | -*             |
| <b>CIF</b> | <b>AE</b> | 2.930               | 2.727          | 2.952             | 2.803          | 3.052           | 2.68           |
| <b>CIF</b> | <b>CE</b> | 2.886               | 2.759          | 2.917             | 2.860          | 3.069           | 2.814          |
| <b>HNC</b> | <b>BD</b> | 3.296               | 2.110          | 3.333             | 2.107          | 3.226           | 2.092          |
| <b>HNC</b> | <b>CD</b> | 3.284               | 2.083          | 3.309             | 2.063          | 3.198           | 2.039          |
| <b>HNC</b> | <b>AE</b> | 3.426               | 2.217          | 3.547             | 2.153          | 3.506           | 2.118          |
| <b>HNC</b> | <b>CE</b> | 3.418               | 2.094          | 3.481             | 2.06           | 3.443           | 2.038          |
| <b>HCN</b> | <b>BD</b> | 3.092               | 2.324          | 3.165             | 2.351          | 3.058           | 2.379          |
| <b>HCN</b> | <b>CD</b> | 3.082               | 2.283          | 3.143             | 2.300          | -               | -              |
| <b>HCN</b> | <b>AE</b> | 3.236               | 2.478          | 3.353             | 2.435          | 3.279           | 2.375          |

\* These geometries spontaneously evolve to other ones

**Geometrical comparative analysis of the interactions distances (Å) calculated for the trimers and the corresponding dimers**

| XY         | Comp.     | $\Delta d_1^a$          |                       |                     | $\Delta d_2^a$          |                       |                     |
|------------|-----------|-------------------------|-----------------------|---------------------|-------------------------|-----------------------|---------------------|
|            |           | M052x/<br>6-311++g(d,p) | MP2/<br>6-311++g(d,p) | MP2/aug-<br>cc-pvtz | M052x/6-<br>311++g(d,p) | MP2/<br>6-311++g(d,p) | MP2/aug-<br>cc-pvtz |
| <b>HF</b>  | <b>BD</b> | -0.044                  | -0.084                | -0.075              | -0.073                  | -0.051                | -0.036              |
| <b>HF</b>  | <b>CD</b> | 0.001                   | -0.060                | -0.066              | -0.050                  | -0.040                | -0.036              |
| <b>HF</b>  | <b>AE</b> | -0.129                  | -0.067                | -0.087              | -0.036                  | -0.031                | -0.028              |
| <b>HF</b>  | <b>CE</b> | -0.143                  | -0.086                | -0.102              | -0.058                  | -0.048                | -0.042              |
| <b>CIF</b> | <b>BD</b> | 0.032                   | 0.062                 | -0.044              | -0.041                  | -0.049                | -0.007              |
| <b>CIF</b> | <b>CD</b> | 0.055                   | —*                    | —*                  | -0.037                  | —*                    | —*                  |
| <b>CIF</b> | <b>AE</b> | 0.017                   | -0.016                | -0.020              | -0.020                  | -0.030                | -0.014              |
| <b>CIF</b> | <b>CE</b> | -0.027                  | -0.051                | -0.003              | -0.040                  | -0.047                | -0.021              |
| <b>HNC</b> | <b>BD</b> | -0.064                  | -0.121                | -0.100              | -0.054                  | -0.063                | -0.051              |
| <b>HNC</b> | <b>CD</b> | -0.076                  | -0.145                | -0.128              | -0.048                  | -0.055                | -0.050              |
| <b>HNC</b> | <b>AE</b> | -0.155                  | -0.151                | -0.187              | -0.043                  | -0.052                | -0.048              |
| <b>HNC</b> | <b>CE</b> | -0.163                  | -0.217                | -0.250              | -0.037                  | -0.058                | -0.051              |
| <b>HCN</b> | <b>BD</b> | -0.062                  | -0.083                | -0.081              | -0.044                  | -0.050                | -0.005              |
| <b>HCN</b> | <b>CD</b> | -0.072                  | -0.105                | —                   | -0.070                  | -0.053                | —                   |
| <b>HCN</b> | <b>AE</b> | -0.049                  | -0.093                | -0.089              | -0.054                  | -0.051                | -0.054              |

<sup>a</sup> Negative values mean shortening of the distance in the trimer compared to isolated dimer.

\* These geometries spontaneously evolve to other ones

**Cartesian coordinates of the optimized structures at MP2/6-311++g(d,p) Level.**

*OPTIMIZED GEOMETRY OF DIMERS*

**HF:NF3 DIMER A**

0,1  
N,0.,0.,-0.0086525337  
F,1.2295525966,0.,-0.5957159492  
F,-0.6147762983,-1.064823784,-0.5957159492  
F,-0.6147762983,1.064823784,-0.5957159492  
H,0.,0.,2.0441122344  
F,0.,0.,2.9644742123

**HF:NF3 DIMER B**

0,1  
N,-1.0263716939,0.7280886578,0.  
F,-1.1561234542,-0.1155792984,1.0628710359  
F,-1.1561234542,-0.1155792984,-1.0628710359  
F,0.3363452155,0.9797471793,0.  
H,1.884913257,-0.4836413707,0.  
F,2.5374511298,-1.1287458696,0.

**HF:NF3 DIMER C**

0,1  
N,-0.3893188493,-1.2109685169,0.  
F,-0.0973147323,-2.0093082861,1.0617240374  
F,-0.0973147323,-2.0093082861,-1.0617240374  
F,0.6893452347,-0.3332626947,0.  
H,0.2345355147,1.6728718478,0.  
F,-0.0384942056,2.5492238259,0.

**HF:NF3 DIMER D**

0,1  
N,0.2418344692,1.415052202,0.  
F,-0.5551375994,1.0933383378,-1.0644841919  
F,-0.5551375994,1.0933383378,1.0644841919  
F,0.1757680949,2.7885352704,0.  
H,0.158695618,-2.3904323858,0.  
F,0.6045741626,-1.589175705,0.

**HF:NF3 DIMER E**

0,1  
N,0.,0.,0.2329942125  
F,1.2312271049,0.,0.8306395705  
F,-0.6156135525,-1.0662739507,0.8306395705  
F,-0.6156135525,1.0662739507,0.8306395705  
F,0.,0.,3.6831190759  
H,0.,0.,4.600063685

**CIF:NF3 DIMER A**

0,1  
N,0.,0.,0.0002836637  
F,1.229960333,0.,-0.5917857575  
F,-0.6149801665,-1.065176894,-0.5917857575  
F,-0.6149801665,1.065176894,-0.5917857575  
Cl,0.,0.,2.8335262083  
F,0.,0.,4.5108547283

**CIF:NF3 DIMER B**

0,1  
N,-0.0006649087,-0.9260679004,0.  
F,-0.7703598855,-0.5514816138,-1.0638390557  
F,-0.7703598855,-0.5514816138,1.0638390557  
F,0.9789065494,0.0438813614,0.  
Cl,0.155394938,2.8992138076,0.  
F,-0.4049507005,4.4775785307,0.

**CIF:NF3 DIMER C**

0,1  
N,0.622712,1.5128,0.  
F,0.622712,2.367033,1.063675  
F,0.622712,2.367033,-1.063675  
F,-0.680284,1.055747,0.  
Cl,-0.487052,-1.845303,0.  
F,-0.129485,-3.480863,0.

**CIF:NF3 DIMER D**

0,1  
N,0.233361025,1.3924089451,0.0000000017  
F,-0.5737727357,1.0979394195,-1.0644787389  
F,-0.573772738,1.0979394131,1.0644787388  
F,0.2191150967,2.7655258466,0.0000000058  
F,0.5305627989,-1.5089022781,-0.0000000066  
Cl,0.1934005948,-3.1483386687,-0.0000000118

**CIF:NF3 DIMER E**

0,1  
N,0.,0.,0.0399976669  
F,1.2302953773,0.,0.6395044282  
F,-0.6151476886,-1.0654670509,0.6395044282  
F,-0.6151476886,1.0654670509,0.6395044282  
F,0.,0.,3.3401382555  
Cl,0.,0.,5.0139522809

**HNC:NF3 DIMER A**

O,1  
N,-0.4527296509,0.,0.  
F,0.1364357712,1.230012086,-0.0000000005  
F,0.1364357712,-0.6150060434,-1.0652217132  
F,0.1364357712,-0.6150060426,1.0652217137  
C,-4.8432234482,0.,0.  
N,-3.661903524,0.,0.  
H,-2.6579300356,0.,0.

**HNC:NF3 DIMER B**

O,1  
N,-1.6356733094,0.760758897,0.  
F,-1.6685186622,-0.0922732845,1.0630188968  
F,-1.6685186622,-0.0922732845,-1.0630188968  
F,-0.3091797358,1.1636598991,0.  
H,1.5103977573,-0.0181560231,0.  
N,2.372851246,-0.5276072861,0.  
C,3.3901499761,-1.1281389778,0.

**HNC:NF3 DIMER C**

O,1  
N,-1.2407036234,-0.4044793008,0.  
F,-2.0264388913,-0.0810137328,-1.0619673703  
F,-2.0264388913,-0.0810137328,1.0619673703  
F,-0.3201803851,0.6380478266,0.  
H,1.7628035253,0.255574605,0.  
N,2.7364743583,0.0189282303,0.  
C,3.8841840637,-0.2609259124,0.

**HNC:NF3 DIMER D**

O,1  
N,0.245256262,1.7660023658,0.0000000017  
F,-0.5823624573,1.5415978324,-1.064171572  
F,-0.5823624596,1.5415978276,1.0641715727  
F,0.3392160991,3.1418391351,0.0000000049  
H,0.2596354469,-3.8696328828,-0.0000000108  
C,0.2134419185,-1.6881835529,-0.000000006  
N,0.2385740963,-2.8690161256,-0.0000000086

**HNC:NF3 DIMER E**

O,1  
N,0.,0.,-0.0055138922  
F,1.2311579504,0.,0.5914811305  
F,-0.6155789752,-1.0662140611,0.5914811305  
F,-0.6155789752,1.0662140611,0.5914811305  
C,0.,0.,4.078419837  
N,0.,0.,5.2599097332  
H,0.,0.,6.2606623578



#### HCN:NF3 DIMER A

O,1  
N,-0.3172577747,0.,0.  
F,0.2768938488,1.2300964029,-0.0000000005  
F,0.2768938488,-0.6150482019,-1.0652947338  
F,0.2768938488,-0.615048201,1.0652947343  
N,-5.0439992369,0.,0.  
C,-3.8724475671,0.,0.  
H,-2.8034562997,0.,0.

#### HCN:NF3 DIMER B

O,1  
N,-0.2875022848,-0.069728907,0.  
F,-1.0830475701,0.2469079811,-1.0639447224  
F,-1.0830475701,0.2469079811,1.0639447224  
F,0.6168935571,0.9719528094,0.  
H,0.2788773496,3.34854581,0.  
C,0.1783810678,4.4120888781,0.  
N,0.0685244506,5.5783954464,0.

#### HCN:NF3 DIMER C

O,1  
N,-0.41319707,-1.3993746075,0.  
F,-0.0816554565,-2.1853040283,1.0632571126  
F,-0.0816554565,-2.1853040283,-1.0632571126  
F,0.6120499,-0.4711739612,0.  
H,0.2559646851,1.8548255422,0.  
C,0.0497576521,2.9030583804,0.  
N,-0.1769790441,4.052334116,0.

#### HCN:NF3 DIMER D

O,1  
N,0.2913306156,1.6671629143,0.0000000018  
F,-0.5005096209,1.3362788835,-1.0641872849  
F,-0.5005096231,1.3362788787,1.0641872854  
F,0.2049896832,3.0427787464,0.0000000049  
N,0.4945529024,-1.5748932689,-0.0000000053  
C,0.2031956949,-2.7093044904,-0.0000000082  
H,-0.061980129,-3.7439981049,-0.0000000108

#### HCN:NF3 DIMER E

O,1  
N,0.,0.,-0.0321285402  
F,1.2313675287,0.,0.5647731336  
F,-0.6156837643,-1.0663955612,0.5647731336  
F,-0.6156837643,1.0663955612,0.5647731336  
N,0.,0.,3.7827581951  
C,0.,0.,4.9541362663  
H,0.,0.,6.0222280571

*OPTIMIZED GEOMETRY OF TRIMERS*

**HF:NF<sub>3</sub>:HF TRIMER BD**

0,1  
N,-0.5262763088,0.7996072217,0.  
F,0.3244167478,0.7510634386,1.0615994156  
F,0.3244167478,0.7510634386,-1.0615994156  
F,-0.8988661658,2.1430046049,0.  
F,0.0463503548,-2.0863801146,0.  
H,0.5724846831,-2.8376878127,0.  
H,0.4415660057,3.7331436167,0.  
F,1.0237720792,4.443139991,0.

**HF:NF<sub>3</sub>:HF TRIMER CD**

0,1  
N,0.5270614889,-0.1963262758,0.  
F,1.1592925477,-0.7603405291,1.0601572147  
F,1.1592925477,-0.7603405291,-1.0601572147  
F,1.0745486669,1.0923872108,0.  
F,-0.6762010303,-2.9077948205,0.  
H,-1.5147935628,-3.2796267406,0.  
H,-0.3110817215,2.5585654702,0.  
F,-0.9954279348,3.1712572127,0.

**HF:NF<sub>3</sub>:HF TRIMER AE**

0,1  
N,-0.0313553784,-0.0543091087,0.1412327341  
F,1.1718984385,-0.1015194189,-0.4939874217  
F,-0.669958559,-1.1604022664,-0.3298383138  
F,-0.6738676174,0.9641341073,-0.4939874217  
H,0.0564238923,0.0977290484,2.156034089  
F,0.0928833596,0.1608786983,3.0745414504  
F,-0.1729598723,-0.2995752872,-3.2133544446  
H,-0.2060572439,-0.3569016166,-4.1278577215

**HF:NF<sub>3</sub>:HF TRIMER CE**

0,1  
N,-0.9925727157,0.0546832584,0.  
F,-1.0674469205,-0.7898852878,1.0624080336  
F,0.3548896597,0.3969288123,0.  
F,-1.0674469205,-0.7898852878,-1.0624080336  
F,1.2207425812,-2.4977731461,0.  
H,1.9234049519,-3.0872469463,0.  
H,0.8830618549,2.334854547,0.  
F,1.0544805313,3.2372045316,0.

**CIF:NF3:CIF TRIMER BD**

0,1  
N,-0.8360985972,0.6206860604,0.  
F,0.0190273172,0.6268857021,1.0630692271  
F,0.0190273172,0.6268857021,-1.0630692271  
F,-1.3005643438,1.9236808052,0.  
F,0.3105267852,-2.1282225019,0.  
Cl,0.9097254304,-3.6906196082,0.  
Cl,0.5060081666,4.221872081,0.  
F,1.5661424997,5.5186736272,0.

**CIF:NF3:CIF TRIMER CD**

0,1  
N,1.3043075969,-0.0296539414,0.  
F,1.6145313568,-0.8284562645,1.0653399894  
F,1.6145313568,-0.8284562645,-1.0653399894  
F,2.3431916677,0.8679821057,0.  
F,-1.9322241305,-3.0368244795,0.  
Cl,-1.8267774214,-1.3638125753,0.  
Cl,-0.8352019558,2.6838389097,0.  
F,-1.9127485484,1.4005472031,0.

**CIF:NF3:CIF TRIMER AE**

0,1  
N,-0.3658741248,0.,0.  
F,0.2240687336,1.2303387086,-0.0000000005  
F,0.2240687336,-0.6151693547,-1.0655045766  
F,0.2240687336,-0.6151693538,1.0655045771  
F,2.90713367,0.,0.  
Cl,4.5809435799,0.,0.  
F,-4.8471707211,0.,0.  
Cl,-3.1689289986,0.,0.

**CIF:NF3:CIF TRIMER CE**

0,1  
N,-1.3391390244,0.5991688364,0.  
F,-1.7013908555,-0.173488836,1.0637164889  
F,0.034697226,0.4625577116,0.  
F,-1.7013908555,-0.173488836,-1.0637164889  
F,-0.1485390037,-2.4483734755,0.  
Cl,0.7085923101,-3.8859957153,0.  
Cl,1.2567485652,3.0486834439,0.  
F,1.7904607122,4.6362624129,0.

**HNC:NF3:HNC TRIMER BD**

0,1  
N,-0.4733532333,0.899342386,0.  
F,0.3760932467,0.851335257,1.0614618286  
F,0.3760932467,0.851335257,-1.0614618286  
F,-0.8406656203,2.2489465692,0.  
H,0.4964463904,-4.5274687106,0.  
C,0.1828152333,-2.3683496868,0.  
N,0.3526720458,-3.5366977848,0.  
H,0.4025809434,3.9496291663,0.  
N,0.9316282848,4.8014132136,0.  
C,1.5535686484,5.8054869847,0.

**HNC:NF3:HNC TRIMER CD**

0,1  
N,0.1370188128,-0.6088196197,0.  
F,0.6730826423,-1.2649818967,-1.0600230145  
F,0.6730826423,-1.2649818967,1.0600230145  
F,-1.1757889542,-1.1057568476,0.  
H,4.7903683442,2.2759420455,0.  
C,3.0518014072,0.9576772075,0.  
N,3.9931251204,1.6702051629,0.  
H,-2.6930353026,0.2918235066,0.  
N,-3.4236827788,0.9792512951,0.  
C,-4.2818760671,1.7906713086,0.

**HNC:NF3:HNC TRIMER AE**

0,1  
N,-0.4871791701,0.,0.  
F,0.0960702672,1.231161142,-0.0000000005  
F,0.0960702672,-0.6155805715,-1.0662168249  
F,0.0960702672,-0.6155805706,1.0662168254  
C,3.4221121406,0.,0.  
N,4.6030777991,0.,0.  
H,5.6041226449,0.,0.  
C,-4.8272389939,0.,0.  
N,-3.6459988283,0.,0.  
H,-2.6404210207,0.,0.

**HNC:NF3:HNC TRIMER CE**

0,1  
N,-1.5386954569,0.274811937,0.  
F,-1.7060862877,-0.555725099,1.0629567777  
F,-0.1630426042,0.4694083694,0.  
F,-1.7060862877,-0.555725099,-1.0629567777  
C,0.9428393389,-2.8310180829,0.  
N,1.6711860989,-3.7607951172,0.  
H,0.7536775519,2.3136813861,0.  
N,1.1850678266,3.219202154,0.  
C,1.6940444024,4.2851095058,0.  
H,2.2893904317,-4.5482040505,0.

**HCN:NF3:HCN TRIMER BD**

0,1  
N,-0.611479074,0.800620443,0.  
F,0.2419322566,0.774585318,1.0624165398  
F,0.2419322566,0.774585318,-1.0624165398  
F,-1.0159279425,2.1309706439,0.  
H,0.6539661669,-4.4526798254,0.  
N,0.1778861828,-2.2646288379,0.  
C,0.4270029077,-3.4088310179,0.  
H,0.4548743163,3.9654814588,0.  
C,1.0615804431,4.8451315463,0.  
N,1.726167308,5.8097021578,0.

**HCN:NF3:HCN TRIMER CD**

0,1  
N,0.2396715444,0.6853262553,0.  
F,0.8389670555,1.2882633528,1.0614922229  
F,0.8389670555,1.2882633528,-1.0614922229  
F,-1.0133863456,1.2976369264,0.  
H,4.6153980256,-2.4177472105,0.  
N,2.9240661925,-0.9500685417,0.  
C,3.8084920804,-1.7175855317,0.  
H,-2.7001100366,-0.2656387196,0.  
C,-3.467943925,-1.0092228645,0.  
N,-4.3090803372,-1.8245549765,0.

**HCN:NF3:HCN TRIMER AE**

0,1  
N,-0.3364668515,0.,0.  
F,0.2523055762,1.2313068337,-0.0000000005  
F,0.2523055762,-0.6156534173,-1.0663429976  
F,0.2523055762,-0.6156534164,1.0663429981  
N,3.3707613289,0.,0.  
C,4.5420658534,0.,0.  
H,5.6103375262,0.,0.  
N,-5.0132780573,0.,0.  
C,-3.8416893966,0.,0.  
H,-2.7719617645,0.,0.
